# Supplementary material
Source: PubMed Central journal article supplement (PMC7745095)
Supplement: 40820_2016_105_MOESM1_ESM.pdf [file 40820_2016_105_MOESM1_ESM.pdf]

## **Supporting Information**

### **Novel Hybrid Nanoparticles of Vanadium Nitride/Porous Carbon as An Anode Material for Symmetrical Supercapacitor**

Yunlong Yang<sup>1</sup>, Kuiwen Shen<sup>1</sup>, Ying Liu<sup>1</sup>, Yongtao Tan<sup>1</sup>, Xiaoning Zhao<sup>1</sup>, Jiayu Wu<sup>1</sup>,  
Xiaoqin Niu<sup>2</sup>, Fen Ran<sup>1,\*</sup>

<sup>1</sup>State Key Laboratory of Advanced Processing and Recycling of Non-ferrous Metals,  
Lanzhou University of Technology, Lanzhou 730050, P. R. China

<sup>2</sup>Chemistry and Biochemistry, University of California Santa Cruz, 1156 High Street,  
Santa Cruz 95064, CA, USA

\*Corresponding author: ranfen@163.com; or ranfen@lut.cn

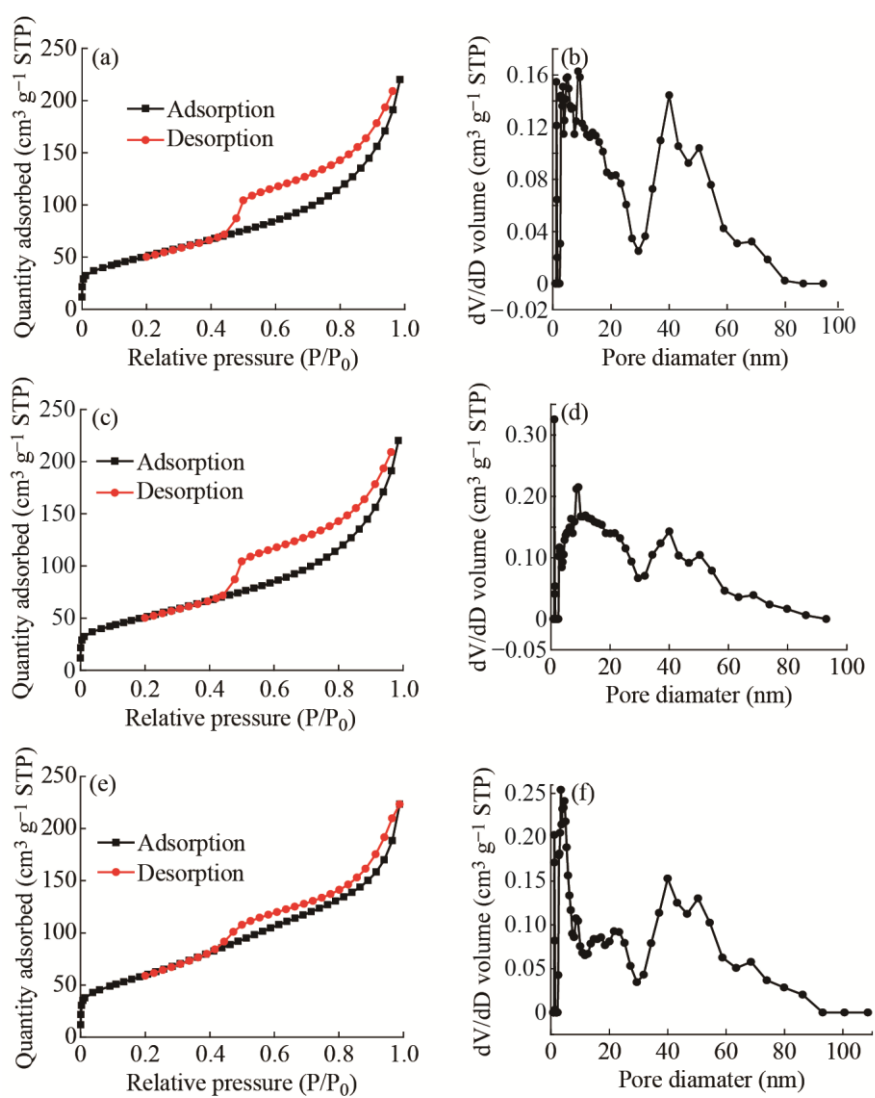

**Figure S1** Nitrogen adsorption-desorption isotherms, and pore size distribution of **(a and b)** VN/CNPs-10-20, **(c and d)** VN/CNPs-10-40, and **(e and f)** VN/CNPs-10-70
